# Supplementary material
Source: Springer Nature journal article supplement (https://www.springermedizin.de/resource/supplementary/12889_2007_1170_MOESM1_ESM.pdf/9502608)

A

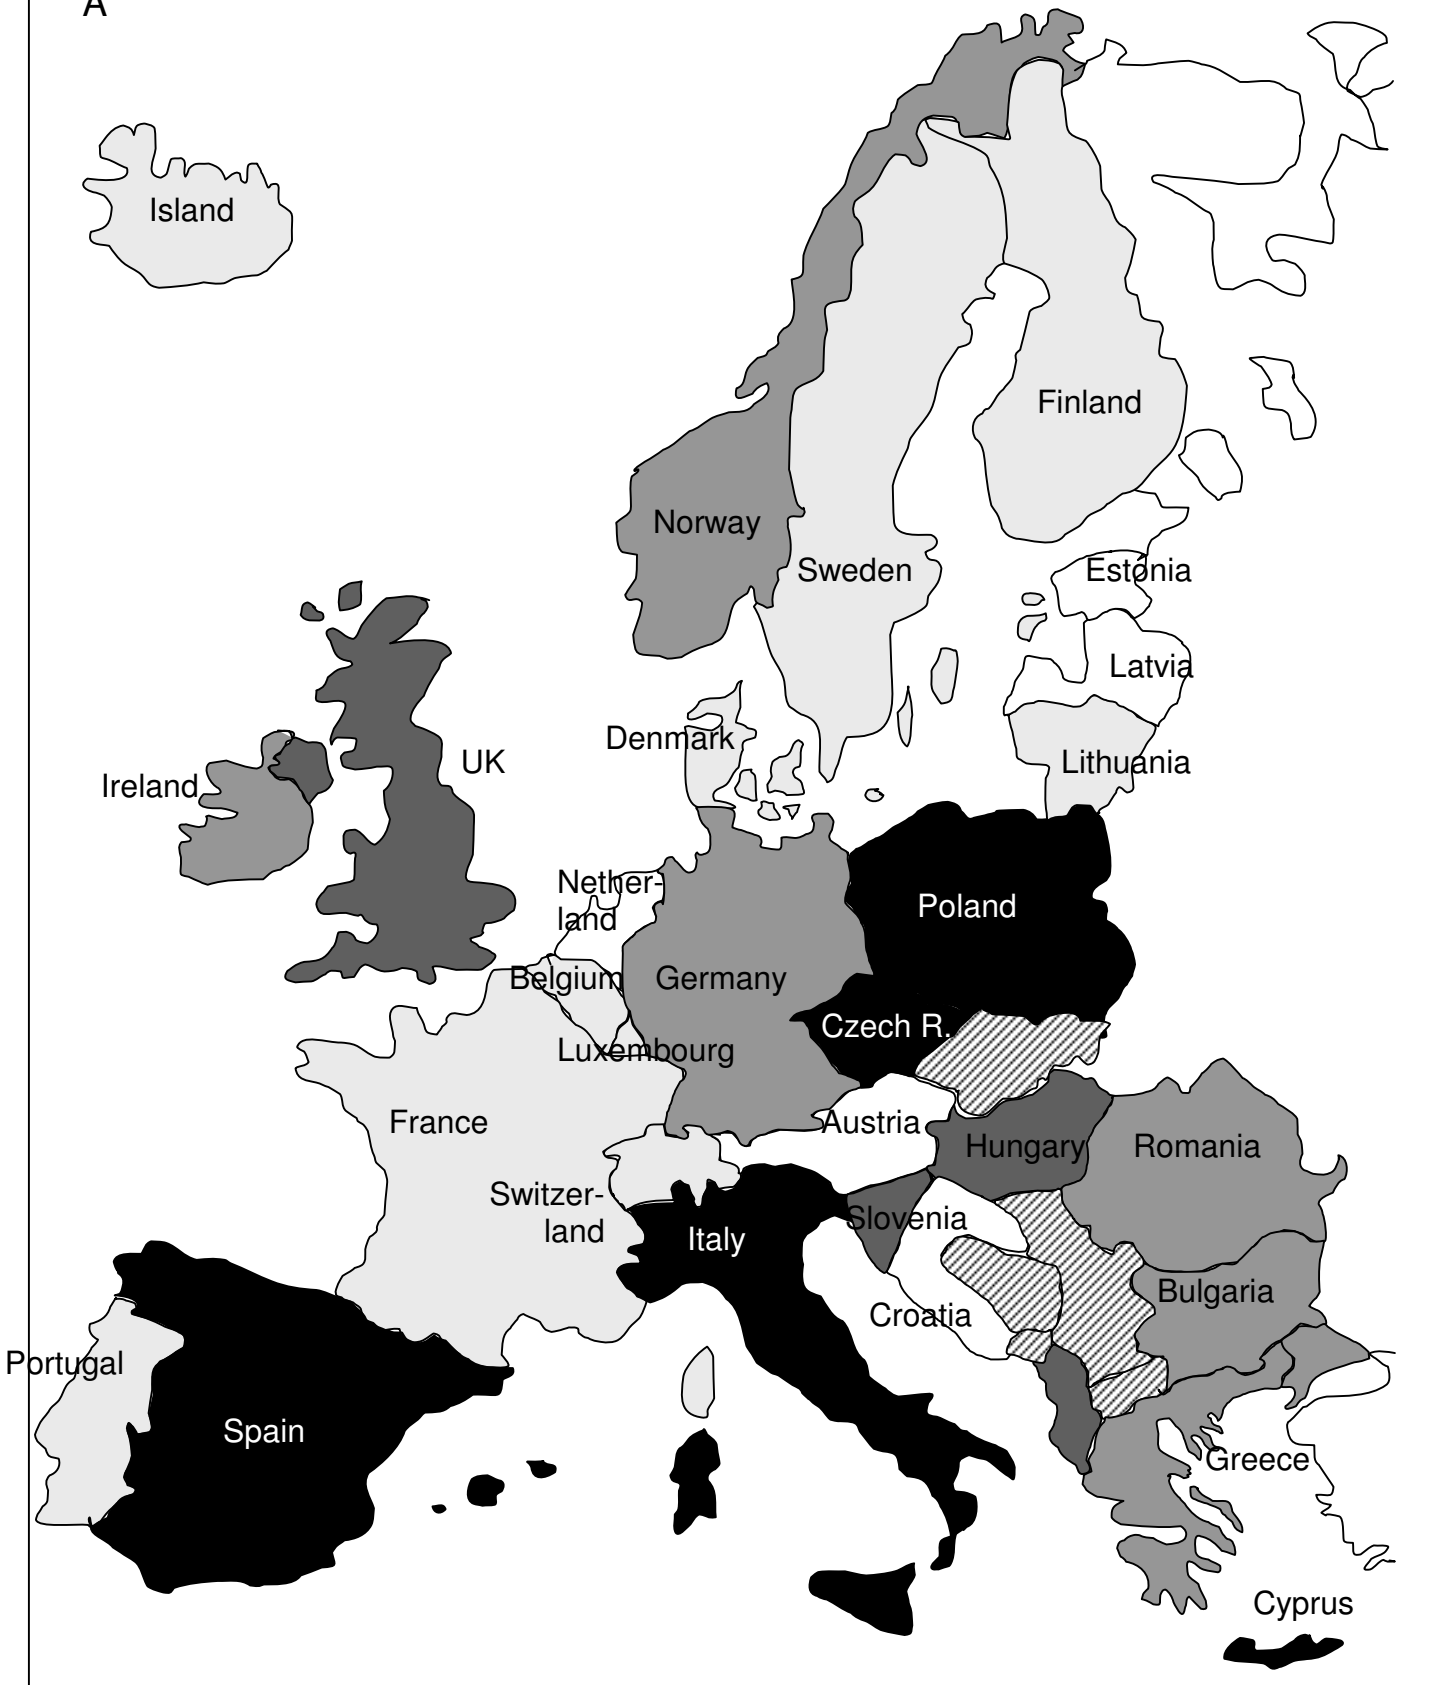

% obese (BMI ≥ 30)

≤ 10

10.1-15

15.1-20

20.1-25

> 25

no data

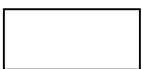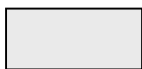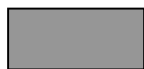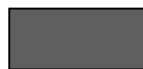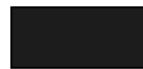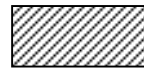

Supplement: MOESM1 [file 9502608]
